# Supplementary material for: Differences in tail feather growth rate in storm-petrels breeding in the Northern and Southern hemisphere: a ptilochronological approach
Source: PeerJ journal article supplement (doi:10.7717/peerj.7807), 2019-10-15

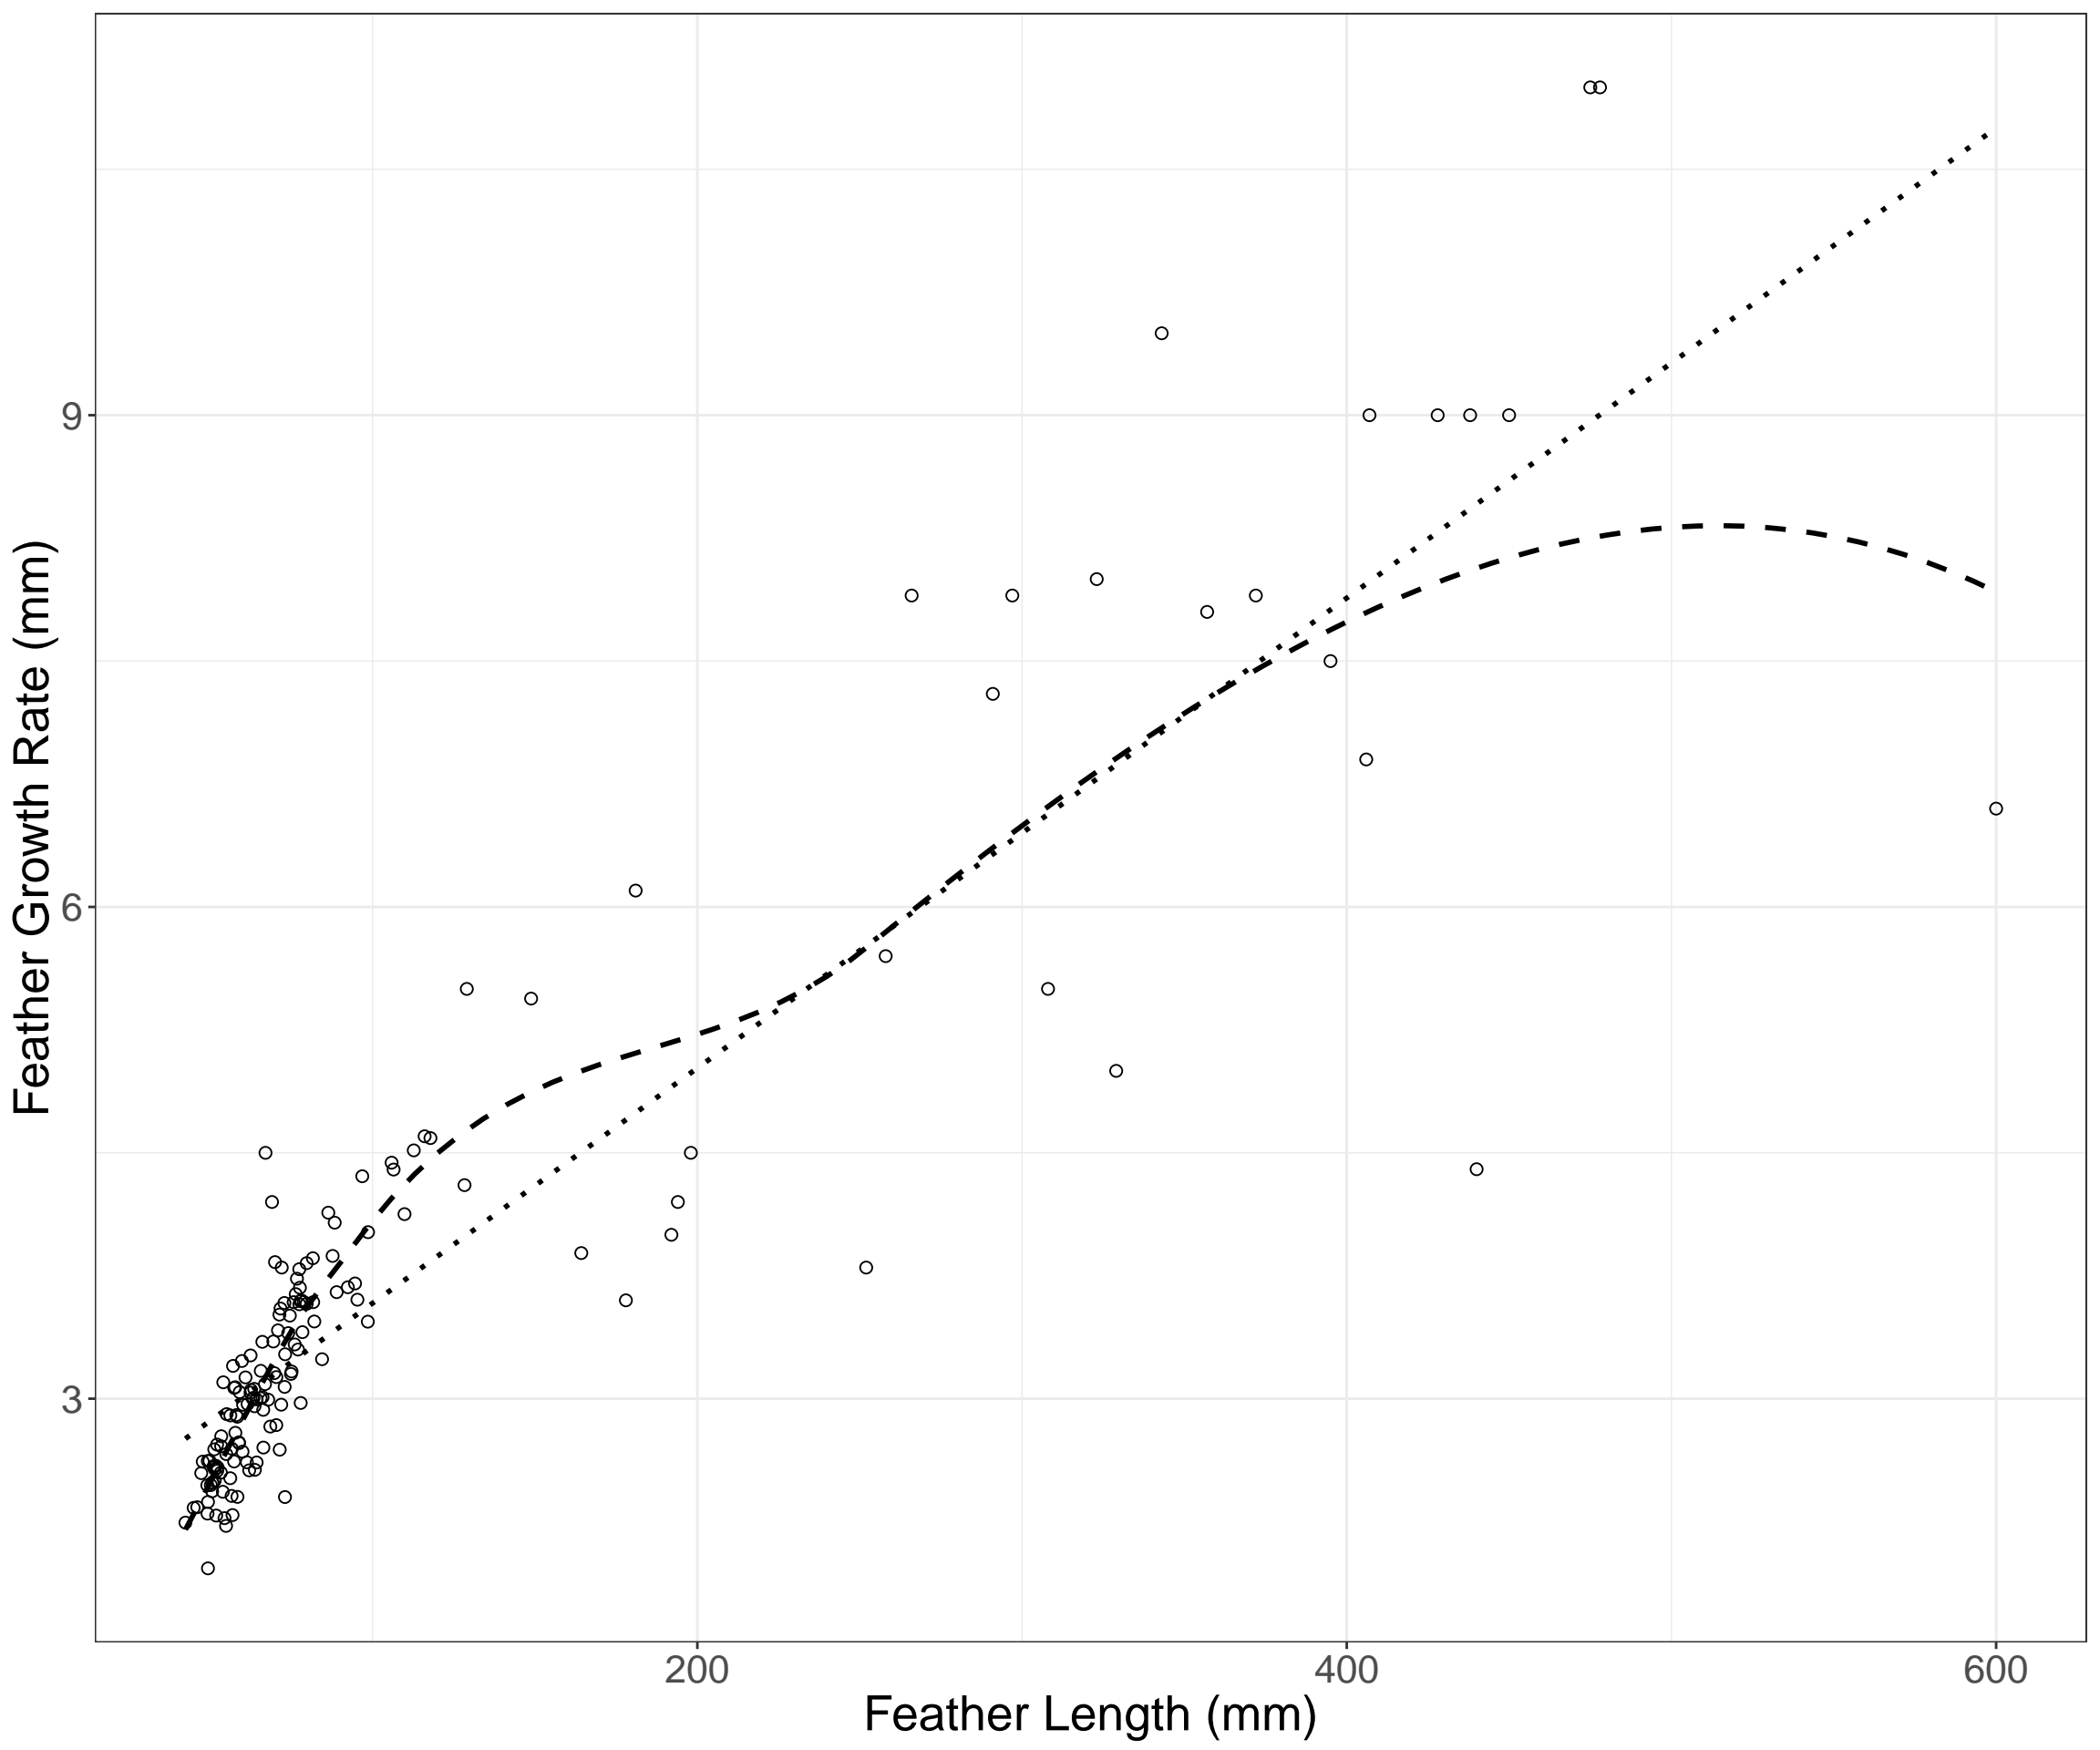

Supplement: Supplemental_Figure_S2.pdf [file Supplemental_Figure_S2.pdf]
